# Supplementary material for: The age-associated loss of ischemic preconditioning in the kidney is accompanied by mitochondrial dysfunction, increased protein acetylation and decreased autophagy
Source: PubMed Central journal article supplement (PMC5353572; doi:10.1038/srep44430), 2017-03-15

# **The age-associated loss of ischemic preconditioning in the kidney is accompanied by mitochondrial dysfunction, increased protein acetylation and decreased autophagy**

**Stanislovas S. Jankauskas<sup>1</sup>, Irina B. Pevzner<sup>1</sup>, Nadezda V. Andrianova<sup>1</sup>, Ljubava D. Zorova<sup>1,2</sup>, Vasily A. Popkov<sup>3</sup>, Denis N. Silachev<sup>1</sup>, Nataliya G. Kolosova<sup>4</sup>, Egor Y. Plotnikov<sup>1,\*</sup>, Dmitry B. Zorov<sup>1,\*</sup>**

*<sup>1</sup>Belozersky Institute of Physico-Chemical Biology, Lomonosov Moscow State University, 119992, Leninskiye Gory, House 1, Building 40, Moscow, Russia*

*<sup>2</sup>International Laser Center, Lomonosov Moscow State University, 119992, Leninskiye Gory, House 1, Building 62, Moscow, Russia*

*<sup>3</sup>Faculty of Bioengineering and Bioinformatics, Lomonosov Moscow State University, 119992, Leninskiye Gory, House 1, Building 73, Moscow, Russia*

*<sup>4</sup>Institute of Cytology and Genetics, Novosibirsk, Russia*

*\*Corresponding authors e-mail addresses: [plotnikov@genebee.msu.ru](mailto:plotnikov@genebee.msu.ru), [zorov@belozersky.msu.su](mailto:zorov@belozersky.msu.su)*

Short title: Lack of ischemic preconditioning in aged kidney

**Supplementary Figure S1** Renal histology of Wistar and OXYS rats. Images show kidney cortex (A) and medulla (B) sections stained with hematoxylin and eosin.

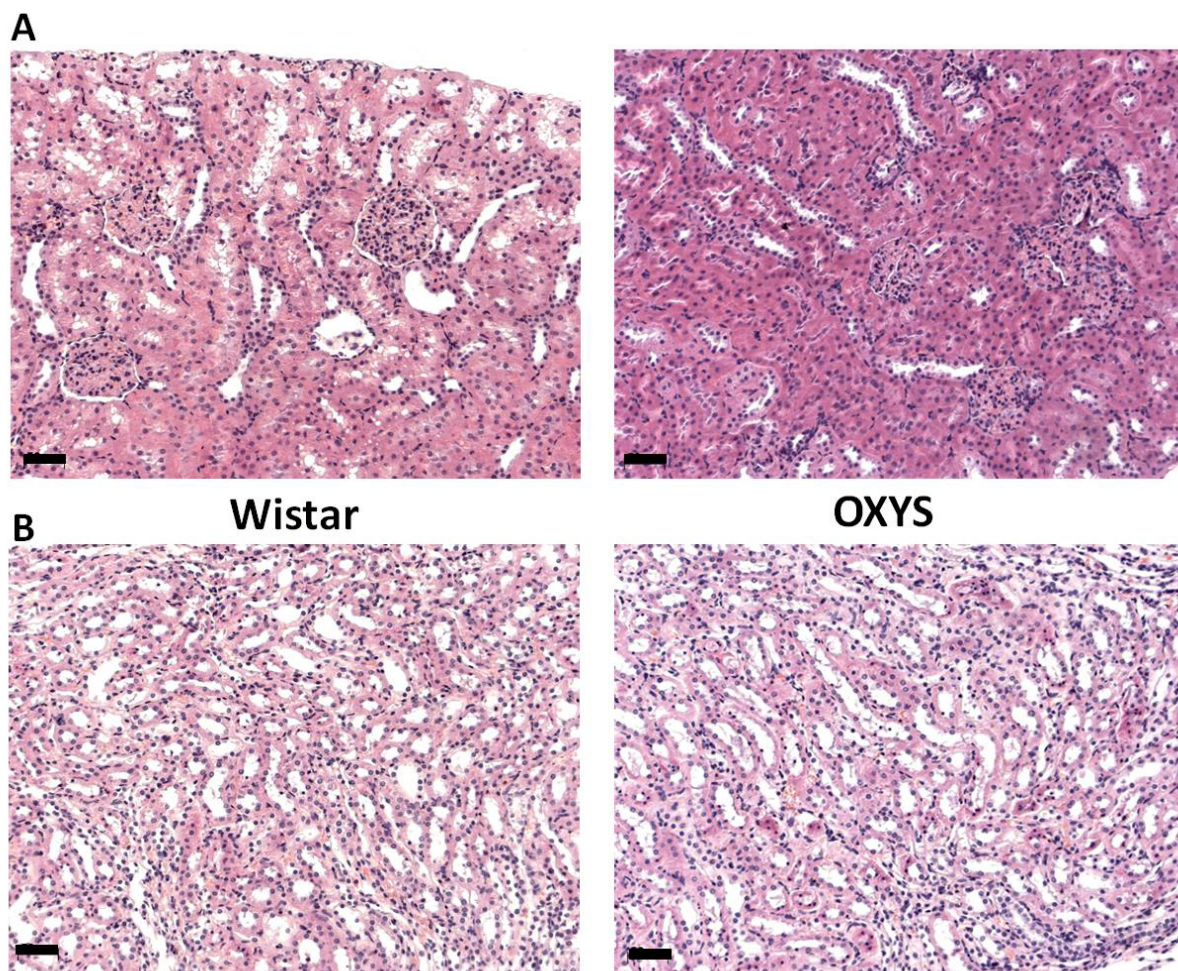

**Supplementary Figure S2** Autophagic and lysosomal activity in kidney after I/R.  
Figure S2 showed the raw uncropped images of figure 4C.

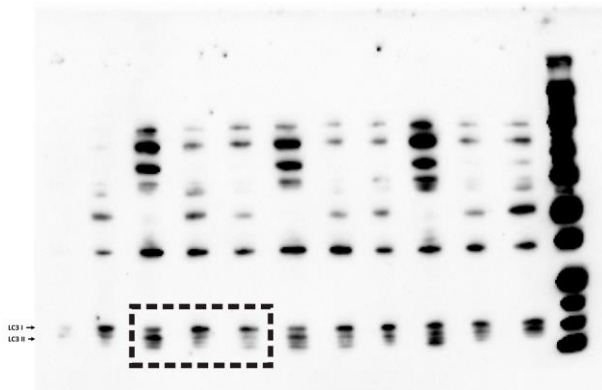

**Supplementary Figure S3.** Autophagy and mitophagy in kidney of OXYS or Wistar rats.  
Figure S3 showed the raw uncropped images of figure 5A,B,C,D.

Figure 5A

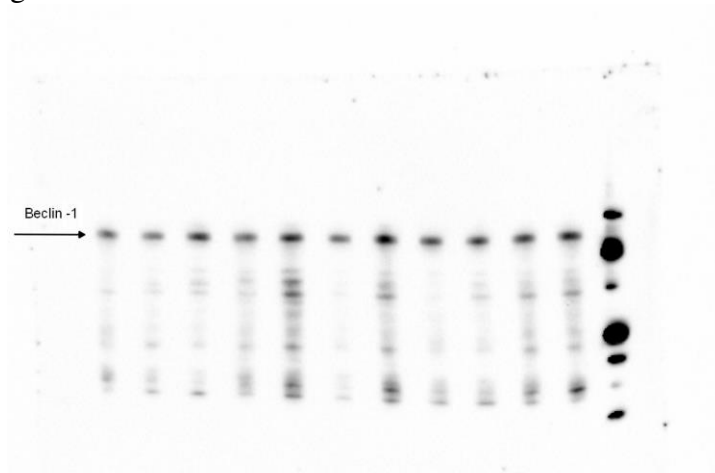

Figure 5B

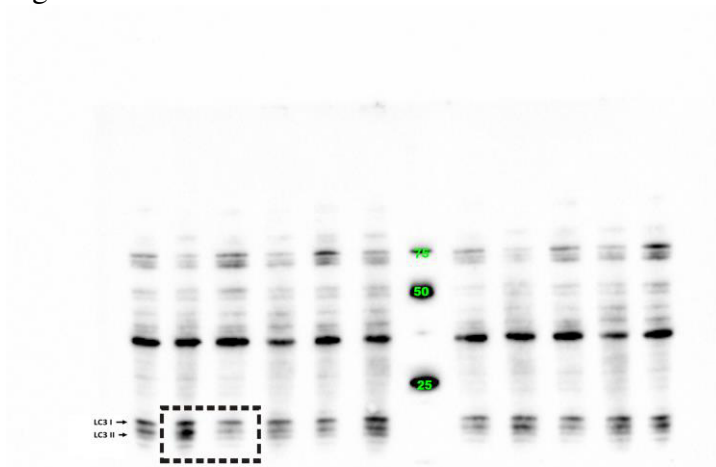

Figure 5C

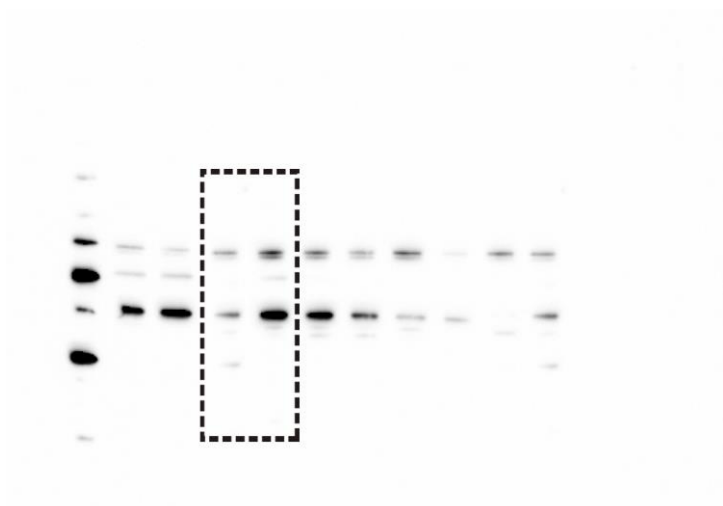

Figure 5D

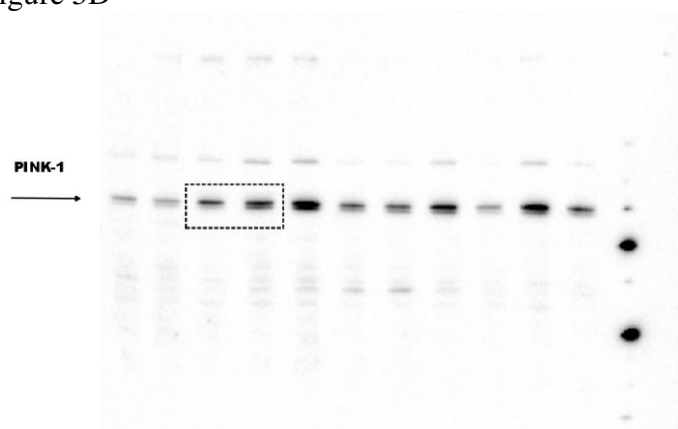

Supplement: srep44430-s1.pdf [file srep44430-s1.pdf]
